# Supplementary material for: Preparation and evaluation of hypocrellin A loaded poly(lactic-co-glycolic acid) nanoparticles for photodynamic therapy
Source: Royal Society of Chemistry journal article supplement (doi:10.1039/c4ra05796a), 2014-01-01
Supplement: c4ra05796a1.pdf [file c4ra05796a1.pdf]

## Supplementary information

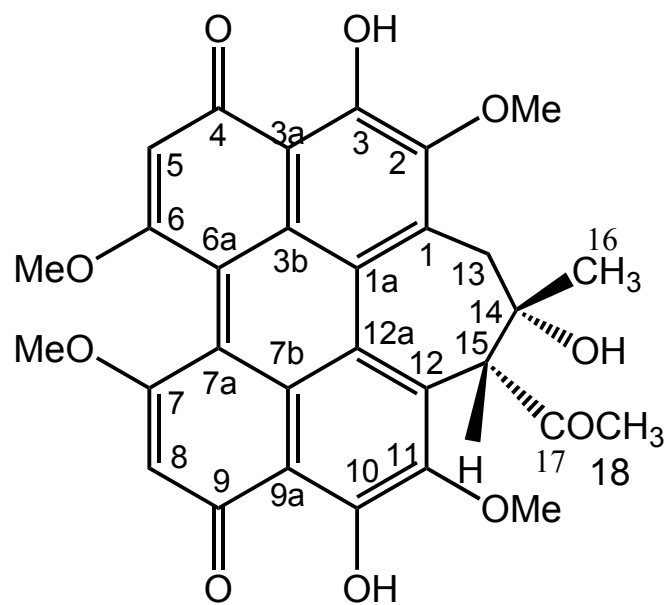

a. Structure of hypocrellin A

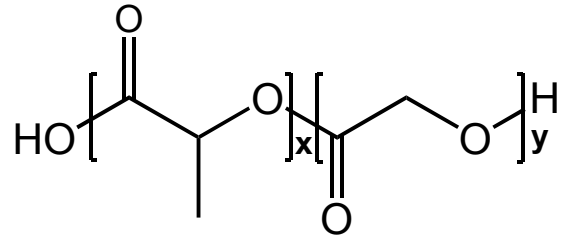

b. Structure of PLGA

c. <sup>1</sup>H NMR spectra of HA

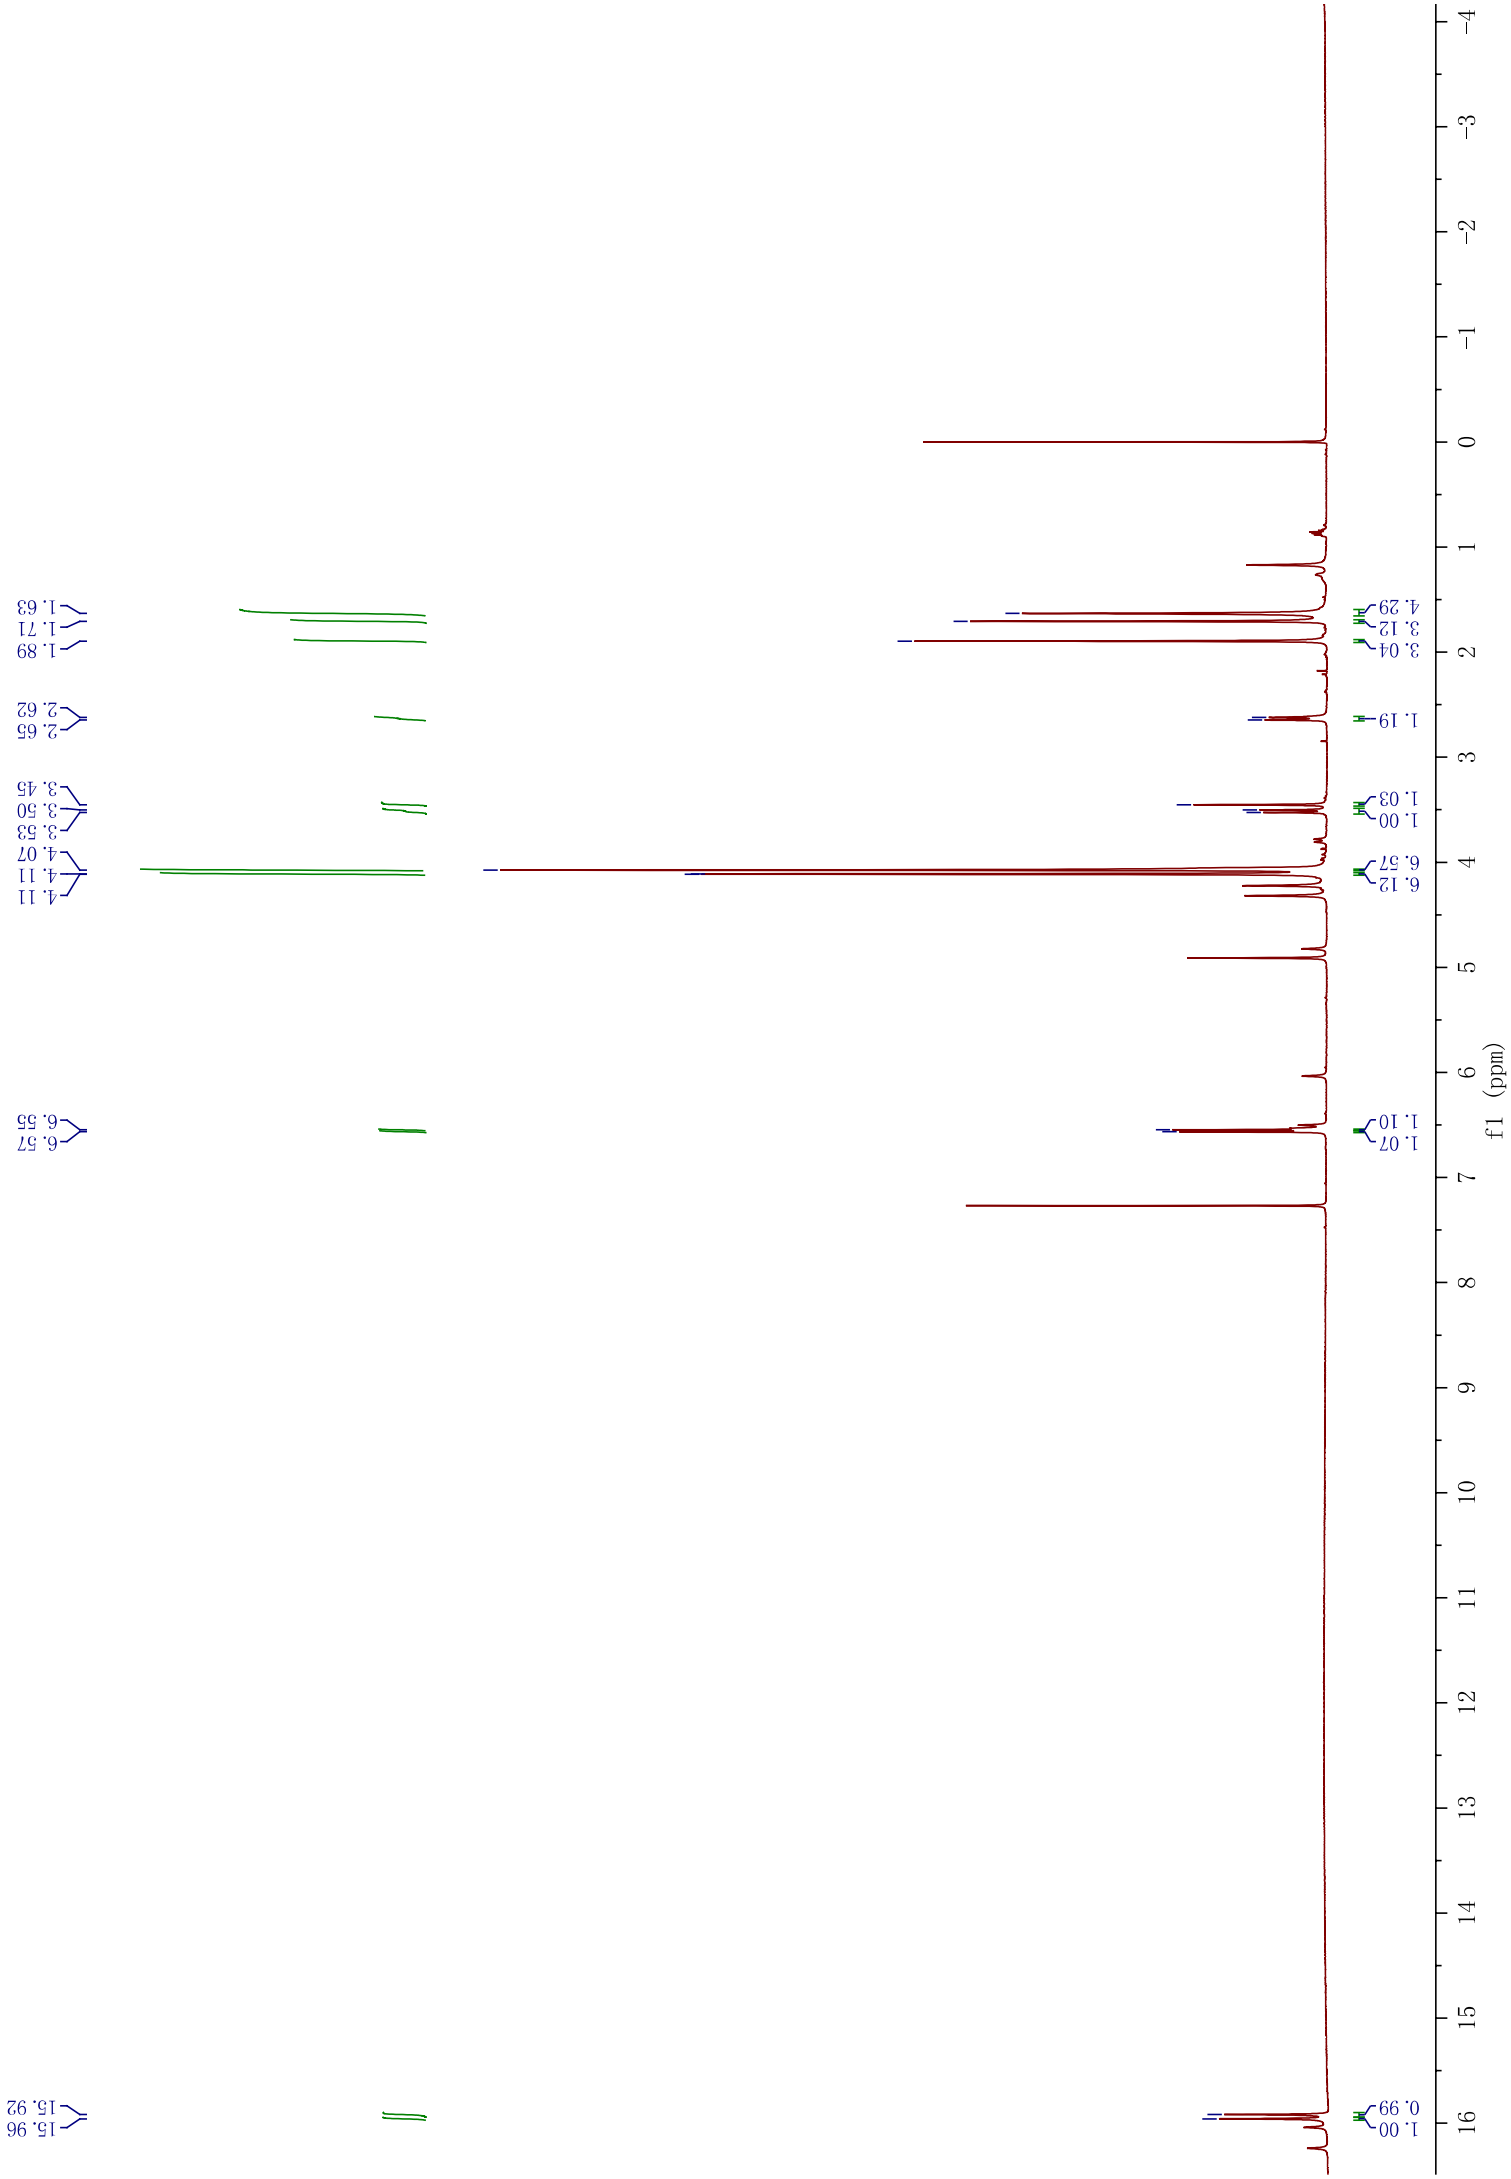

d.<sup>13</sup>C NMR spectra of HA

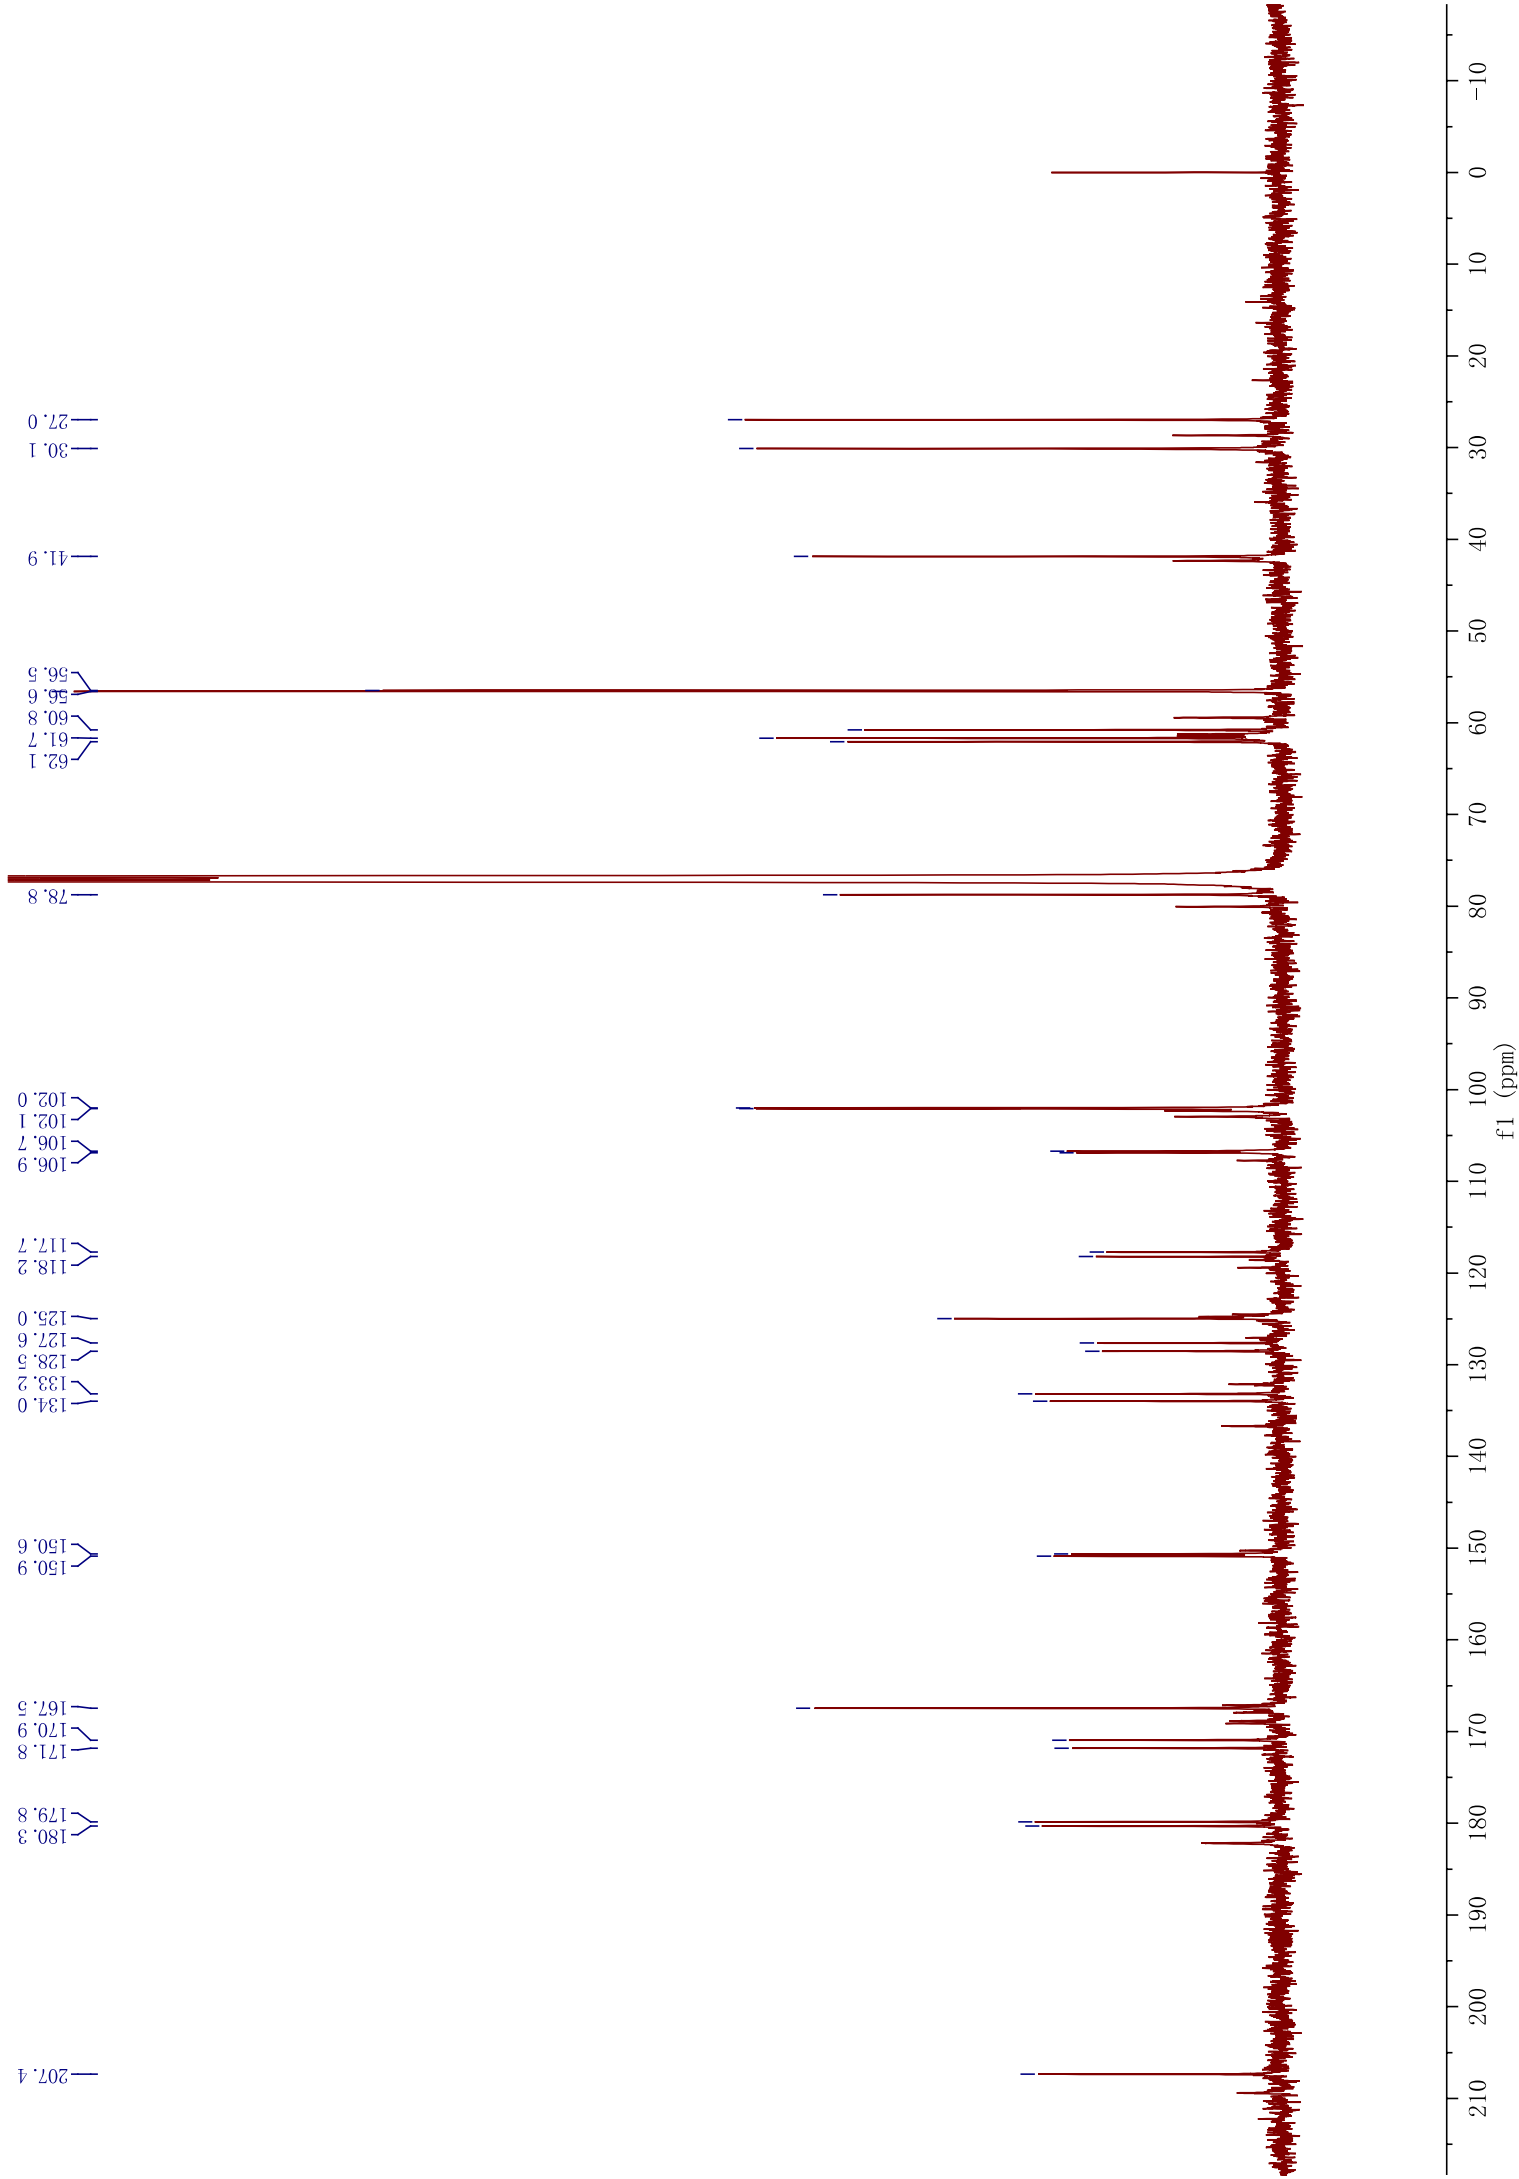

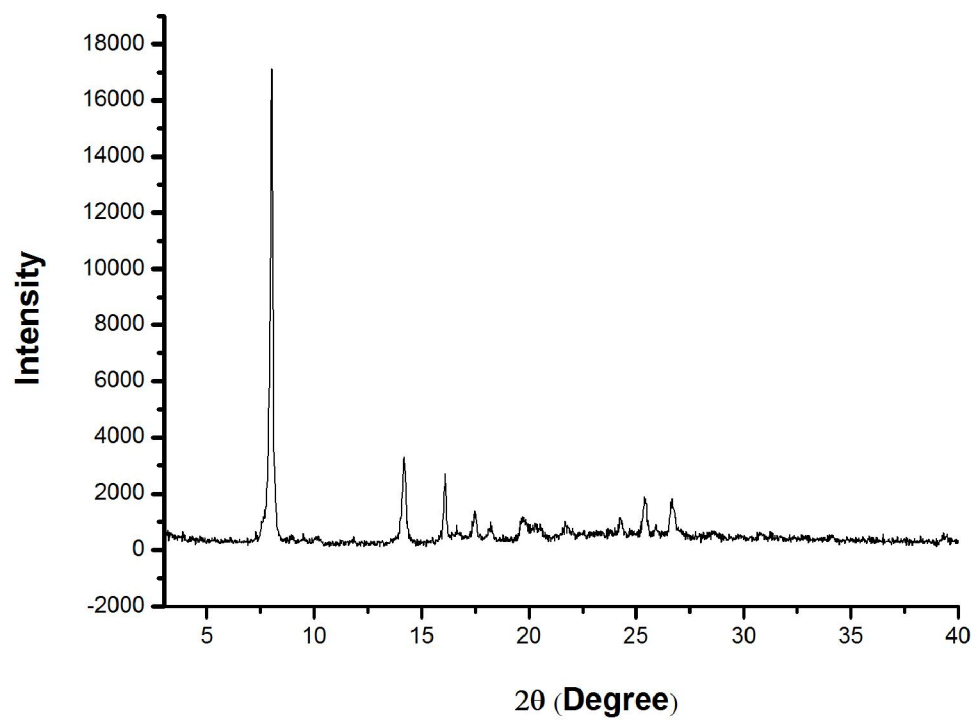

e. XRD spectra of HA

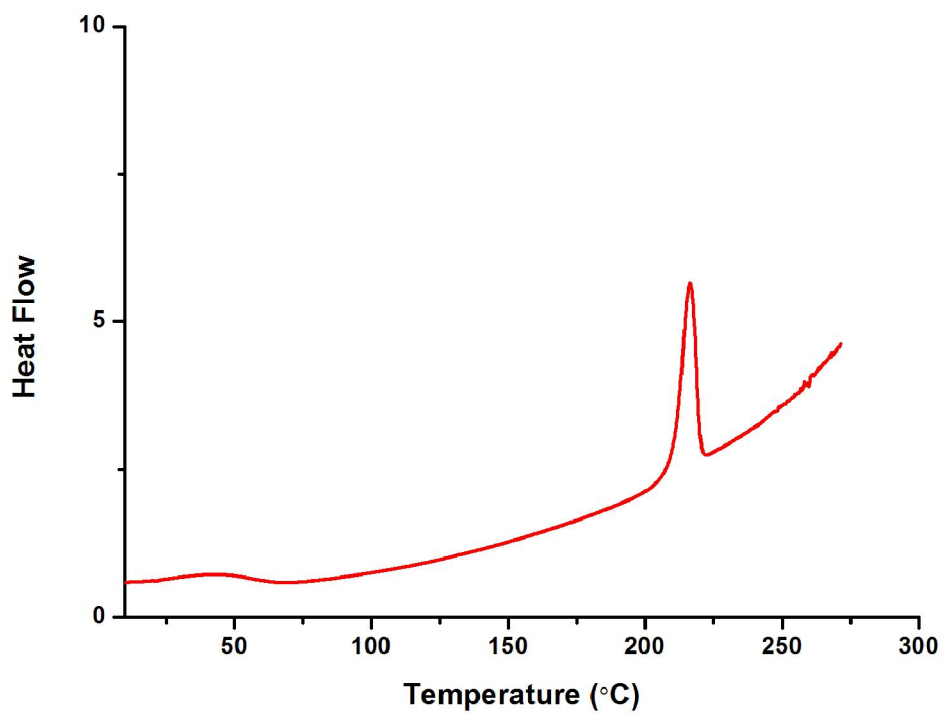

f. DSC spectra of HA

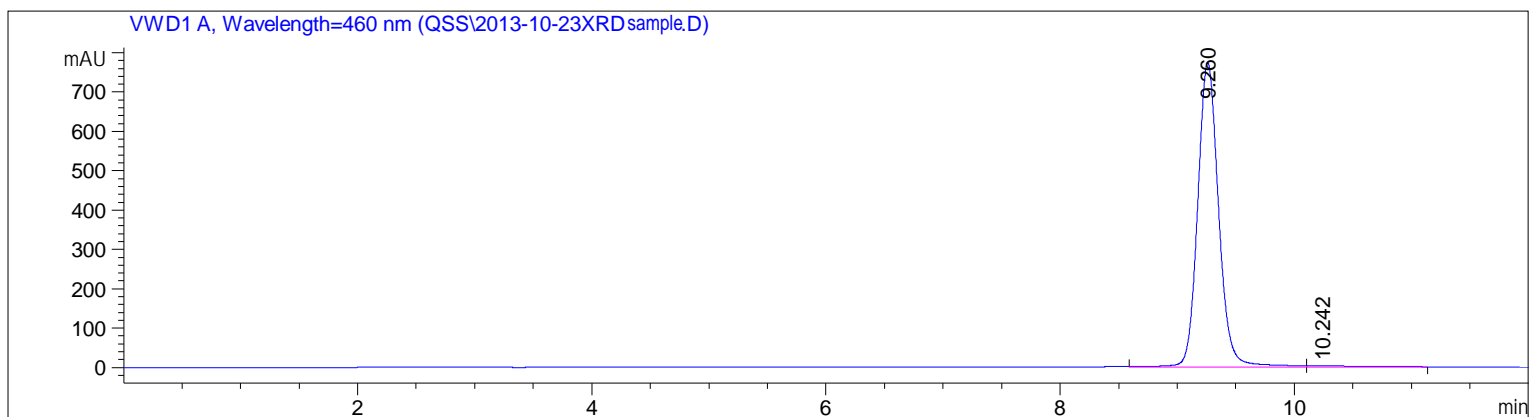

g. HPLC report on HA purity

=====  
 Area Percentage Report  
 =====

Sort : Signal  
 Multiplicative Factor : 1.0000  
 Dilution Factor : 1.0000

signal 1: VWD1 A, Wavelength=460 nm

| peaks # | retention time [min] | peak width [min] | peak area [mAU*s] | peak height [mAU] | peak width % |
|---------|----------------------|------------------|-------------------|-------------------|--------------|
| 1       | 9.260 VV             | 0.1911           | 9628.50195        | 774.02173         | 99.0703      |
| 2       | 10.242 VB            | 0.3215           | 90.35640          | 3.40585           | 0.9297       |
